# Supplementary material for: Integrated DNA methylation and gene expression analysis identifies SLAMF7 as a key regulator of atherosclerosis
Source: PubMed Central journal article supplement (PMC6046250; doi:10.18632/aging.101470), 2018-06-13
Supplement: aging-10-101470-s001.pdf [file aging-10-101470-s001.pdf]

## SUPPLEMENTARY MATERIAL

**Supplementary Table 1. Genes up-regulated in AS with hypo-methylated CpGs in the promoter regions**

| Gene_Symbol  | mRNA_log2Fold<br>(AS/control) | %Methy_Diff<br>(AS-control) | methy_fisher_p | methy_FDR  |
|--------------|-------------------------------|-----------------------------|----------------|------------|
| SPP1         | 12.1995                       | -14.09437219                | 0.00114708     | 0.00598555 |
| TRAC         | 10.8889                       | -15.14144606                | 3.76E-06       | 3.96E-05   |
| APOC1        | 10.6362                       | -0.614550652                | 4.13E-05       | 0.00033242 |
| CCL3         | 8.49961                       | -7.24090593                 | 0.02986314     | 0.08984943 |
| LINC00900    | 8.38495                       | -5.571183584                | 0.02537851     | 0.07931603 |
| TXLNG2P      | 8.19567                       | -15.74460724                | 1.39E-05       | 0.00012962 |
| HES2         | 8.09795                       | -18.50904778                | 0.0040868      | 0.01730754 |
| BC040631     | 7.92439                       | -10.83517548                | 4.60E-05       | 0.00036382 |
| TLR7         | 7.85045                       | -17.7032105                 | 0.00097932     | 0.0052411  |
| CXCR3        | 7.78663                       | -25.44959802                | 0.01752354     | 0.05871114 |
| GZMA         | 7.53397                       | -37.65147584                | 5.86E-07       | 7.42E-06   |
| EOMES        | 7.40862                       | -10.67027489                | 1.14E-07       | 1.67E-06   |
| KMO          | 7.08425                       | -2.96941286                 | 0.01129243     | 0.04095411 |
| SLAMF7       | 7.0626                        | -18.42986699                | 5.26E-05       | 0.00041041 |
| LOC100506776 | 6.90242                       | -9.115560366                | 0.02979639     | 0.08976024 |
| CD52         | 6.79467                       | -34.45675627                | 5.11E-08       | 8.52E-07   |
| LILRB4       | 6.74963                       | -20.43933227                | 0.00921425     | 0.03461066 |
| LY9          | 6.67798                       | -22.63815167                | 7.26E-07       | 8.96E-06   |
| TDO2         | 6.65902                       | -4.605610294                | 0.02270635     | 0.07292916 |
| STAP1        | 6.52246                       | -15.82994896                | 2.57E-05       | 0.0002195  |
| FCGR3A       | 6.50852                       | -9.241461931                | 0.00451974     | 0.01888298 |
| IGSF6        | 6.40885                       | -12.31232729                | 0.00374737     | 0.01612971 |
| SAMD3        | 6.36852                       | -11.93853896                | 0.0001327      | 0.00094693 |
| DCSTAMP      | 6.19836                       | -21.41787974                | 2.36E-07       | 3.20E-06   |
| KCNA3        | 6.1858                        | -20.115835                  | 3.59E-08       | 6.12E-07   |
| TMEM26       | 6.09135                       | -12.93714587                | 0.00041833     | 0.00248634 |
| ITGAL        | 6.03052                       | -13.07823613                | 6.84E-06       | 6.86E-05   |
| KLRC1        | 5.94987                       | -3.990151803                | 4.18E-05       | 0.00033402 |
| DQ658414     | 5.84523                       | -3.373964093                | 0.00161661     | 0.00798076 |
| LYZ          | 5.84024                       | -19.4847124                 | 5.15E-06       | 5.30E-05   |
| ARL11        | 5.77745                       | -8.245751718                | 0.00013698     | 0.00097172 |

|          |         |              |            |            |
|----------|---------|--------------|------------|------------|
| RAB42    | 5.7742  | -7.163643235 | 0.01843926 | 0.06090477 |
| TRAT1    | 5.76121 | -8.466366097 | 7.66E-06   | 7.53E-05   |
| P2RX7    | 5.75476 | -16.26746957 | 2.01E-08   | 3.56E-07   |
| MYBL2    | 5.69482 | -28.11865912 | 0.00010533 | 0.00076975 |
| CD8A     | 5.68958 | -13.12367894 | 0.00183734 | 0.00903356 |
| FCGR1C   | 5.67327 | -23.10791611 | 0.00024918 | 0.0016031  |
| CD96     | 5.53367 | -12.94060914 | 9.09E-12   | 2.75E-10   |
| CYSLTR2  | 5.39354 | -19.86475214 | 4.68E-05   | 0.00036893 |
| CD4      | 5.38596 | -16.43867651 | 0.00024487 | 0.00158806 |
| EMR4P    | 5.37993 | -20.02069884 | 0.01676856 | 0.05665243 |
| OSCAR    | 5.31551 | -0.932093835 | 0.00723399 | 0.02786467 |
| CD2      | 5.26337 | -20.68318378 | 3.71E-07   | 4.79E-06   |
| SLAMF8   | 5.24399 | -27.77007314 | 0.01768823 | 0.05918094 |
| PDE6B    | 5.19618 | -22.03391053 | 5.91E-08   | 9.53E-07   |
| KLRK1    | 5.18093 | -11.8750407  | 0.00016549 | 0.00114052 |
| CCL5     | 5.16838 | -23.89408369 | 0.00028373 | 0.00180141 |
| C15orf48 | 5.14186 | -19.0811632  | 1.24E-11   | 3.67E-10   |
| CD48     | 5.10651 | -12.78881535 | 0.01075954 | 0.03925691 |
| SUCNR1   | 5.0365  | -10.69821356 | 0.00048397 | 0.00284158 |
| MS4A14   | 5.0305  | -8.9192849   | 0.01045855 | 0.03833217 |
| MT1H     | 5.01515 | -30.43015677 | 0.00024912 | 0.0016031  |
| PIK3CG   | 4.98865 | -31.92217984 | 0.00034729 | 0.00211608 |
| S1PR5    | 4.98161 | -2.12528141  | 0.00446743 | 0.01869671 |
| LILRB1   | 4.91497 | -15.45219996 | 0.00322032 | 0.01431978 |
| IL2RG    | 4.88028 | -20.33311777 | 7.59E-09   | 1.43E-07   |
| PARVG    | 4.87332 | -40.22913848 | 3.91E-19   | 3.26E-17   |
| ADAM28   | 4.85682 | -19.77653358 | 1.90E-08   | 3.40E-07   |
| AK055623 | 4.84076 | -47.13293651 | 0.00084423 | 0.00462035 |
| SCUBE1   | 4.82531 | -9.759671545 | 0.01021424 | 0.03760767 |
| AK307192 | 4.81634 | -32.57472527 | 0.02321301 | 0.07398192 |
| LAIR1    | 4.76632 | -5.551449059 | 0.03273751 | 0.0962236  |
| TCRVB    | 4.75972 | -10.43300887 | 0.00351669 | 0.01535539 |
| TRAF3IP3 | 4.7484  | -27.14939455 | 2.61E-06   | 2.95E-05   |
| ARL4C    | 4.72364 | -23.84440419 | 1.08E-19   | 9.30E-18   |
| SRGAP3   | 4.70534 | -6.262804585 | 0.00519573 | 0.02133868 |

|           |         |              |            |            |
|-----------|---------|--------------|------------|------------|
| EVI2A     | 4.68699 | -36.37913582 | 3.51E-29   | 9.42E-27   |
| SASH3     | 4.68156 | -16.25641923 | 0.00944487 | 0.03531244 |
| CD33      | 4.55821 | -3.029596065 | 0.03120322 | 0.09261422 |
| GAL3ST4   | 4.55167 | -33.95360922 | 3.49E-05   | 0.00028494 |
| LILRA1    | 4.52312 | -13.8993262  | 0.02217335 | 0.07151644 |
| DOK2      | 4.50332 | -30.81529582 | 0.00059409 | 0.00342986 |
| C1QA      | 4.49405 | -30.67581373 | 0.00219422 | 0.01048445 |
| LRRC33    | 4.43969 | -43.72235736 | 3.16E-08   | 5.46E-07   |
| VAMP8     | 4.43364 | -18.39795918 | 0.00616426 | 0.02464685 |
| FABP5     | 4.42594 | -18.96814532 | 1.76E-14   | 8.51E-13   |
| ARHGAP8   | 4.39278 | -10.97142587 | 8.33E-06   | 8.13E-05   |
| TYROBP    | 4.37663 | -17.42548029 | 0.03426166 | 0.09987229 |
| RASL10A   | 4.37439 | -3.820032334 | 4.80E-06   | 4.98E-05   |
| DSC2      | 4.33136 | -7.334668188 | 0.00291025 | 0.01318333 |
| IKZF3     | 4.32523 | -11.01793622 | 0.02473971 | 0.07782232 |
| BC044305  | 4.3238  | -13.3000148  | 0.02166587 | 0.0701603  |
| BUB1B     | 4.3044  | -7.485262964 | 0.0081223  | 0.0309415  |
| ASF1B     | 4.28317 | -26.54715856 | 0.00733901 | 0.02817947 |
| MS4A7     | 4.25979 | -17.74404332 | 0.02164803 | 0.0701603  |
| NR1H3     | 4.22868 | -33.74885392 | 0.00696498 | 0.02695725 |
| BC016366  | 4.21897 | -7.551957022 | 0.01537879 | 0.05306888 |
| CCRL2     | 4.18439 | -21.34824714 | 5.84E-09   | 1.15E-07   |
| RCAN3     | 4.18389 | -9.482672267 | 0.00669409 | 0.02611775 |
| TAGAP     | 4.18111 | -33.66286435 | 2.20E-35   | 1.06E-32   |
| KRT8      | 4.15309 | -4.868873686 | 0.00365063 | 0.01582594 |
| TRGV3     | 4.06026 | -6.10792293  | 0.00601718 | 0.02413856 |
| MKI67     | 4.03232 | -20.34106639 | 1.63E-07   | 2.36E-06   |
| DAPP1     | 4.02498 | -30.71879509 | 2.79E-06   | 3.14E-05   |
| PRKCQ     | 4.01839 | -0.777225228 | 0.00932102 | 0.03495744 |
| TNFAIP8L2 | 3.9839  | -31.60703406 | 2.66E-08   | 4.63E-07   |
| FTCDNL1   | 3.9612  | -15.86552059 | 8.36E-08   | 1.30E-06   |
| C1orf233  | 3.95945 | -14.05194805 | 0.03392181 | 0.09922232 |
| OSBPL3    | 3.93382 | -17.376593   | 3.97E-11   | 1.07E-09   |
| LGALS2    | 3.93287 | -1.765053829 | 0.0162522  | 0.05529404 |
| CCR2      | 3.9244  | -13.53552769 | 0.00557792 | 0.02263925 |

|                 |         |              |            |            |
|-----------------|---------|--------------|------------|------------|
| LILRA2          | 3.905   | -48.17469295 | 0.0004399  | 0.00259542 |
| GPR65           | 3.84498 | -30.58007789 | 3.08E-13   | 1.14E-11   |
| PTPRC           | 3.84223 | -31.74937863 | 5.29E-18   | 3.76E-16   |
| SP140           | 3.82056 | -3.278828167 | 0.00112724 | 0.00593056 |
| AK310146        | 3.8189  | -3.176734137 | 0.00063493 | 0.00362237 |
| MS4A6A          | 3.80729 | -5.053437334 | 0.02793566 | 0.08553969 |
| KIF20A          | 3.79211 | -2.129894788 | 0.01818105 | 0.06032917 |
| TROAP           | 3.75663 | -33.38726805 | 2.63E-11   | 7.40E-10   |
| CXCR4           | 3.75612 | -20.03639803 | 9.72E-16   | 5.11E-14   |
| CD101           | 3.75262 | -25.66616519 | 1.06E-07   | 1.58E-06   |
| GPR34           | 3.75217 | -13.92790518 | 0.00266617 | 0.01217836 |
| TBXAS1          | 3.74512 | -17.33333333 | 6.94E-06   | 6.91E-05   |
| MLPH            | 3.74136 | -9.881467007 | 0.00013495 | 0.00096011 |
| TNFSF12-TNFSF13 | 3.7281  | -10.69760101 | 0.03057096 | 0.09163713 |
| BC033739        | 3.71782 | -9.009674408 | 0.00295374 | 0.01333041 |
| APBB1IP         | 3.70332 | -12.64009518 | 4.27E-05   | 0.00033959 |
| SLC22A18        | 3.68421 | -23.28010834 | 1.37E-05   | 0.00012808 |
| ABCC3           | 3.68024 | -8.751725328 | 0.01406188 | 0.04922675 |
| ACAP1           | 3.67648 | -10.09145881 | 0.00352924 | 0.01538241 |
| NCKAP5          | 3.66221 | -6.778036546 | 0.01585874 | 0.0544146  |
| VSIG4           | 3.60784 | -52.51984127 | 0.00134267 | 0.00683771 |
| APOBR           | 3.59592 | -42.05801342 | 2.11E-06   | 2.43E-05   |
| LPXN            | 3.53758 | -7.567171264 | 7.09E-09   | 1.36E-07   |
| KLRG1           | 3.52646 | -21.20117465 | 1.26E-11   | 3.69E-10   |
| PCED1B-AS1      | 3.49794 | -31.24555733 | 1.85E-07   | 2.60E-06   |
| ABRACL          | 3.48663 | -3.512245549 | 0.00618386 | 0.02468443 |
| LGMN            | 3.44317 | -6.458715391 | 0.02761735 | 0.08488737 |
| GDPD1           | 3.43712 | -31.16917017 | 3.17E-05   | 0.00026182 |
| TK1             | 3.43512 | -28.95497127 | 0.00113708 | 0.00595366 |
| NELL2           | 3.41114 | -11.97206889 | 5.04E-06   | 5.21E-05   |
| KYNU            | 3.39642 | -20.08782959 | 1.48E-08   | 2.72E-07   |
| GAS2L3          | 3.3908  | -0.832057855 | 5.52E-08   | 8.96E-07   |
| AX747844        | 3.38471 | -17.75308223 | 1.14E-05   | 0.00010798 |
| WAS             | 3.37141 | -24.30304814 | 1.82E-10   | 4.59E-09   |
| LAT2            | 3.37111 | -14.33576121 | 3.38E-06   | 3.65E-05   |

|               |         |              |            |            |
|---------------|---------|--------------|------------|------------|
| CYTH4         | 3.36817 | -41.69711506 | 2.36E-11   | 6.70E-10   |
| LRMP          | 3.36346 | -33.38239116 | 1.51E-12   | 5.01E-11   |
| GPNMB         | 3.34435 | -8.197992236 | 0.00442435 | 0.01855163 |
| SYTL1         | 3.32729 | -27.66281866 | 0.00020454 | 0.00135932 |
| FGD6          | 3.32282 | -14.67300487 | 9.76E-05   | 0.00072007 |
| INPP5D        | 3.27805 | -48.10515873 | 1.38E-14   | 6.79E-13   |
| F2R           | 3.22673 | -10.13072047 | 0.02975049 | 0.0897337  |
| RGS1          | 3.22422 | -16.05274249 | 0.00264987 | 0.01217836 |
| CLDN23        | 3.21783 | -17.45061286 | 0.03432913 | 0.09993041 |
| DAPK1         | 3.2053  | -9.680115714 | 0.01165589 | 0.0421459  |
| MARCO         | 3.20137 | -17.02638037 | 0.00047273 | 0.00278231 |
| APOBEC3C      | 3.19451 | -7.660605954 | 2.54E-06   | 2.88E-05   |
| RUNX3         | 3.18907 | -10.34632035 | 0.01878872 | 0.06183663 |
| RGS18         | 3.15948 | -21.74056408 | 3.19E-06   | 3.47E-05   |
| GMFG          | 3.15697 | -11.203363   | 1.85E-05   | 0.00016427 |
| TMEM176B      | 3.14626 | -10.21067502 | 8.55E-07   | 1.04E-05   |
| GAPT          | 3.12984 | -25.41499412 | 4.22E-19   | 3.41E-17   |
| COL21A1       | 3.10813 | -8.635582428 | 0.01564148 | 0.05382182 |
| TLR5          | 3.10278 | -14.27210278 | 0.01866033 | 0.06149774 |
| RBM47         | 3.0979  | -2.850369328 | 0.00030391 | 0.00191947 |
| ABCA1         | 3.08113 | -21.88259583 | 0.00018348 | 0.00123974 |
| MS4A4A        | 3.07338 | -19.77727354 | 9.28E-06   | 8.94E-05   |
| RASSF7        | 3.07004 | -36.8968254  | 2.25E-07   | 3.08E-06   |
| AK095210      | 3.0609  | -19.31335326 | 2.68E-13   | 1.01E-11   |
| MELK          | 3.05437 | -23.36211692 | 9.22E-09   | 1.73E-07   |
| BX648270      | 3.02876 | -8.03784996  | 0.00022626 | 0.0014873  |
| BIRC5         | 3.0133  | -2.178546549 | 3.71E-06   | 3.91E-05   |
| KLRC4         | up      | -17.73070801 | 2.29E-13   | 8.78E-12   |
| APOC1P1       | up      | -31.58963585 | 9.79E-08   | 1.49E-06   |
| E02193        | up      | -9.426587093 | 1.56E-05   | 0.00014277 |
| TRA           | up      | -23.88952064 | 0.00018987 | 0.00127939 |
| BC055085      | up      | -9.276907176 | 0.00032708 | 0.00201839 |
| TCRBV7S1A1N2T | up      | -39.96869489 | 0.00201611 | 0.00975394 |
| ATP6V0D2      | up      | -8.273059983 | 0.00367934 | 0.01592187 |
| TIFAB         | up      | -1.754936584 | 0.01804886 | 0.06008188 |

|                |    |              |            |            |
|----------------|----|--------------|------------|------------|
| AF086258       | up | -2.131004724 | 0.02321121 | 0.07398192 |
| TCRBV22S1A2N1T | up | -4.490161111 | 0.02489996 | 0.07812321 |
| ZEB2_AS1_1     | up | -1.732804233 | 0.03153068 | 0.09347145 |

**Note:** The ones with no fold change is because they do not express at healthy control sample (FPKM=0) but expressed at AS sample. So the log2(fold) is then calculated by log2(0) which is negative inf. The software outputs no value of fold change for these genes but actually they have significant fold change between AS and control.

**Supplementary Table 2. Genes down-regulated in AS with hyper-methylated CpGs in the promoter regions.**

| Gene_Symbol | mRNA_log2Fold<br>(AS/control) | %Methy_Diff<br>(AS-control) | methy_fisher_p | methy_FDR  |
|-------------|-------------------------------|-----------------------------|----------------|------------|
| BC073897    | -11.5986                      | 6.121004238                 | 0.007613895    | 0.02918861 |
| AF086165    | -10.3295                      | 2.172995359                 | 0.003874275    | 0.01649978 |
| CNTFR       | -9.29815                      | 44.375                      | 0.002201777    | 0.01048445 |
| CSF3        | -8.90856                      | 21.02022977                 | 0.001483699    | 0.00747723 |
| AVPR1A      | -8.8681                       | 33.65998151                 | 2.28E-27       | 5.01E-25   |
| CXCL14      | -7.92924                      | 17.20634557                 | 6.92E-07       | 8.59E-06   |
| C6          | -7.64111                      | 7.906780256                 | 0.00311002     | 0.01390598 |
| AK125532    | -7.38541                      | 55.69677681                 | 1.67E-57       | 1.35E-54   |
| APOD        | -6.85829                      | 5.557003104                 | 0.01648122     | 0.05591595 |
| FAM180B     | -6.59223                      | 16.67726967                 | 0.000140959    | 0.00099411 |
| MT1M        | -6.40692                      | 16.8123314                  | 5.25E-08       | 8.70E-07   |
| RORB        | -6.36547                      | 10.35263795                 | 0.006456462    | 0.02539542 |
| BC047605    | -6.27905                      | 6.920291918                 | 0.000691085    | 0.00388775 |
| LBP         | -6.25886                      | 9.648470357                 | 0.000812343    | 0.00445591 |
| ADAMTS4     | -6.19165                      | 24.74702381                 | 0.002207851    | 0.01049271 |
| PROK2       | -6.05656                      | 9.663616562                 | 0.002232598    | 0.0105688  |
| HOXA9       | -6.03977                      | 19.57159528                 | 5.47E-16       | 2.95E-14   |
| PII5        | -5.94165                      | 19.00880893                 | 0.002635002    | 0.01216425 |
| CLDN5       | -5.71824                      | 10.53982852                 | 2.48E-10       | 6.07E-09   |
| TMEM233     | -5.67907                      | 20.82264957                 | 0.026133117    | 0.08146393 |
| TFF3        | -5.62271                      | 8.29135374                  | 0.002738144    | 0.01247377 |
| FAM110D     | -5.28716                      | 28.13083213                 | 0.000226906    | 0.0014875  |
| RGS6        | -5.14325                      | 13.82441078                 | 0.000177291    | 0.00120468 |
| BMX         | -5.11986                      | 15.15734693                 | 3.31E-08       | 5.67E-07   |
| LDLR        | -5.0365                       | 20.6688421                  | 1.75E-07       | 2.51E-06   |

|          |          |             |             |            |
|----------|----------|-------------|-------------|------------|
| MT1X     | -4.94598 | 42.37799476 | 3.48E-10    | 8.18E-09   |
| AOX1     | -4.7587  | 19.11903281 | 1.01E-07    | 1.51E-06   |
| NR4A3    | -4.72595 | 0.294851078 | 0.009924942 | 0.03687931 |
| SOX17    | -4.71135 | 13.42897771 | 1.24E-11    | 3.67E-10   |
| HOXA10   | -4.64858 | 25.12110005 | 8.80E-34    | 3.55E-31   |
| RBPMS2   | -4.57446 | 19.4762695  | 4.20E-10    | 9.67E-09   |
| MCF2L    | -4.42802 | 3.186038904 | 0.002634643 | 0.01216425 |
| NR4A1    | -4.38657 | 3.695266264 | 0.00600465  | 0.02412832 |
| MT2A     | -4.38131 | 23.86477846 | 5.38E-07    | 6.85E-06   |
| CCM2L    | -4.29128 | 3.743291761 | 0.00418471  | 0.01766634 |
| TUSC5    | -4.26888 | 52.17887205 | 1.38E-24    | 1.76E-22   |
| PLIN4    | -4.257   | 15.7998668  | 0.006036413 | 0.02417563 |
| CLSTN2   | -4.25008 | 27.40363289 | 2.96E-06    | 3.27E-05   |
| DPY19L2  | -4.22369 | 11.27650119 | 5.63E-06    | 5.72E-05   |
| C7       | -4.17668 | 5.588163476 | 0.01354179  | 0.04773192 |
| SERPINA5 | -4.11836 | 19.96693122 | 1.71E-05    | 0.0001524  |
| BRE-AS1  | -4.1119  | 24.53430044 | 1.34E-21    | 1.41E-19   |
| ADAMTS1  | -4.08496 | 6.01431113  | 0.003487817 | 0.01525683 |
| TSPAN7   | -4.06452 | 10.46124622 | 4.24E-06    | 4.42E-05   |
| MEDAG    | -4.02678 | 13.42752618 | 0.002553318 | 0.01188013 |
| KANK3    | -3.8917  | 9.043617349 | 0.00767579  | 0.02937933 |
| THBS4    | -3.88021 | 27.27968451 | 4.07E-13    | 1.49E-11   |
| PCDH17   | -3.78562 | 13.09585625 | 0.022221256 | 0.07157552 |
| PHYHIP   | -3.77722 | 28.26483371 | 0.005972331 | 0.02403838 |
| EBF2     | -3.75141 | 7.686923132 | 0.026891861 | 0.08318595 |
| DGAT2    | -3.74582 | 6.826814059 | 0.001260319 | 0.00648662 |
| SLC39A14 | -3.71396 | 1.007899039 | 0.029921552 | 0.08991333 |
| Myopodin | -3.66343 | 43.82118736 | 8.81E-24    | 1.07E-21   |
| MUSTN1   | -3.65429 | 48.92013889 | 3.77E-07    | 4.85E-06   |
| PTPRQ    | -3.64299 | 13.63114646 | 1.81E-07    | 2.58E-06   |
| C9orf47  | -3.62157 | 6.049101262 | 0.003140082 | 0.0140145  |
| FBXO16   | -3.58903 | 5.712883738 | 0.02273195  | 0.07292916 |
| SSTR1    | -3.50912 | 19.8560608  | 1.69E-06    | 1.96E-05   |
| TAL1     | -3.48942 | 58.33994709 | 2.40E-07    | 3.24E-06   |
| ZBTB16   | -3.48632 | 5.291132479 | 0.007078422 | 0.02735256 |

|          |          |             |             |            |
|----------|----------|-------------|-------------|------------|
| FAM198A  | -3.46243 | 30.63808807 | 5.33E-21    | 5.16E-19   |
| PRG4     | -3.4491  | 18.9573628  | 4.51E-10    | 1.01E-08   |
| G0S2     | -3.4349  | 11.49384138 | 0.001592875 | 0.00790804 |
| PPP1R1A  | -3.43103 | 21.8707483  | 0.024076092 | 0.07583342 |
| SOX18    | -3.39546 | 11.6394386  | 0.029319315 | 0.0885436  |
| SCN3B    | -3.39291 | 34.88705507 | 9.96E-08    | 1.51E-06   |
| FBP2     | -3.34205 | 3.200510649 | 0.001318928 | 0.00673099 |
| KCNK1    | -3.32402 | 26.46076342 | 9.50E-18    | 6.56E-16   |
| ATP1A2   | -3.31381 | 29.0010915  | 0.000167244 | 0.00114933 |
| C1QTNF3  | -3.29007 | 6.945108646 | 0.001187426 | 0.00616391 |
| GPC3     | -3.27342 | 3.370215311 | 0.021246796 | 0.06898792 |
| NNMT     | -3.26587 | 28.17046622 | 2.33E-10    | 5.75E-09   |
| HIF3A    | -3.20512 | 21.03174603 | 0.02854558  | 0.08685756 |
| MPZL2    | -3.20496 | 9.51155318  | 7.25E-06    | 7.19E-05   |
| DGKD     | -3.07944 | 21.03626235 | 0.030698957 | 0.0919069  |
| MMRN2    | -3.07221 | 16.58019662 | 1.59E-07    | 2.32E-06   |
| C19orf33 | -3.07088 | 17.45394112 | 0.000416484 | 0.00248147 |
| GPC6     | -3.06675 | 16.40791854 | 1.11E-05    | 0.00010633 |
| GALNT15  | -3.02986 | 18.59920635 | 3.71E-09    | 7.74E-08   |
| F5       | -3.02819 | 12.7817197  | 0.000163332 | 0.00112886 |
| S1PR3    | -3.02476 | 13.24637275 | 0.000334071 | 0.00205147 |
| FAM150B  | -3.01748 | 13.44225838 | 4.71E-17    | 3.08E-15   |
| ITIH3    | -3.0084  | 56.41522367 | 2.41E-05    | 0.00020891 |
| TPO      | down     | 39.67311305 | 5.69E-25    | 8.10E-23   |
| SERTM1   | down     | 12.43678531 | 0.001309479 | 0.00669689 |
| TAC1     | down     | 3.534061986 | 0.030061257 | 0.09022107 |

**Note:** The ones with no fold change is because they do not express at AS sample (FPKM=0) but expressed at healthy control sample. So the  $\log_2(\text{fold})$  is then calculated by  $\log_2(0)$  which is negative inf. The software outputs no value of fold change for these genes but actually they have significant fold change between AS and control.



**Supplementary Table 3.KEGG pathways of the DEGs with altered methylation in the promoter regions.**

| <b>Genes with up-regulated expression and hypo-methylated CpG island in the promoter regions</b>    |          |                                                               |
|-----------------------------------------------------------------------------------------------------|----------|---------------------------------------------------------------|
| KEGG pathway Term                                                                                   | P Value  | Genes                                                         |
| hsa04380:Osteoclast differentiation                                                                 | 0.000209 | PIK3CG, LILRB1, LILRA1, LILRA2, OSCAR, LILRB4, FCGR3A, TYROBP |
| hsa04620:Toll-like receptor signaling pathway                                                       | 0.003076 | PIK3CG, CCL3, TLR5, CCL5, TLR7, SPP1                          |
| hsa05340:Primary immunodeficiency                                                                   | 0.003861 | PTPRC, CD8A, IL2RG, CD4                                       |
| hsa04612:Antigen processing and presentation                                                        | 0.005512 | KLRC4, CD8A, LGMN, CD4, KLRC1                                 |
| hsa04650:Natural killer cell mediated cytotoxicity                                                  | 0.005609 | PIK3CG, CD48, ITGAL, KLRK1, FCGR3A, TYROBP                    |
| hsa04062:Chemokine signaling pathway                                                                | 0.007769 | PIK3CG, CCL3, CXCR4, CCR2, CXCR3, CCL5, WAS                   |
| hsa04514:Cell adhesion molecules (CAMs)                                                             | 0.010505 | ITGAL, PTPRC, CD8A, CD2, CD4, CLDN23                          |
| hsa04660:T cell receptor signaling pathway                                                          | 0.015736 | PIK3CG, PTPRC, PRKCQ, CD8A, CD4                               |
| hsa04611:Platelet activation                                                                        | 0.033535 | PIK3CG, TBXAS1, VAMP8, APBB1IP, F2R                           |
| hsa04666:Fc gamma R-mediated phagocytosis                                                           | 0.044159 | PIK3CG, PTPRC, INPP5D, WAS                                    |
| hsa04640:Hematopoietic cell lineage                                                                 | 0.045476 | CD8A, CD33, CD2, CD4                                          |
| hsa05323:Rheumatoid arthritis                                                                       | 0.049542 | ITGAL, CCL3, CCL5, ATP6V0D2                                   |
| <b>Genes with down-regulated expression and hyper-methylated CpG island in the promoter regions</b> |          |                                                               |
| hsa04978:Mineral absorption                                                                         | 0.001196 | MT1M, MT2A, ATP1A2, MT1X                                      |
| hsa04610:Complement and coagulation cascades                                                        | 0.003842 | C7, F5, SERPINA5, C6                                          |

**Supplementary Table 4.GO annotations of the DEGs with altered methylation in the promoter regions.**

| <b>Genes with up-regulated expression and hypo-methylated CpG island in the promoter regions</b> |            |                                                                                                                                                                                             |
|--------------------------------------------------------------------------------------------------|------------|---------------------------------------------------------------------------------------------------------------------------------------------------------------------------------------------|
| GO_Term                                                                                          | P Value    | Genes                                                                                                                                                                                       |
| GO:0050776~regulation of immune response                                                         | 1.62E-09   | LILRB1, ITGAL, CD96, LAIR1, LILRA1, TRAC, CD8A, CD33, OSCAR, KLRK1, SLAMF7, FCGR3A, KLRC1, TYROBP                                                                                           |
| GO:0002250~adaptive immune response                                                              | 2.58E-08   | PIK3CG, LILRB1, LAIR1, LAT2, LILRA1, LILRA2, LILRB4, KLRK1, EOMES, CD4, SLAMF7, TRAT1                                                                                                       |
| GO:0006954~inflammatory response                                                                 | 5.36E-08   | PIK3CG, ITGAL, CCL3, SCUBE1, LYZ, TLR5, CXCR3, CCL5, TLR7, CCRL2, PRKCQ, P2RX7, KLRG1, CXCR4, CCR2, SPP1, F2R                                                                               |
| GO:0006955~immune response                                                                       | 1.24E-06   | CCL3, CD8A, GZMA, CYSLTR2, GPR65, TRGV3, CCL5, WAS, IGSF6, CD96, RGS1, CCR2, CD4, IL2RG, TNFSF12-TNFSF13, FCGR3A                                                                            |
| GO:0007166~cell surface receptor signaling pathway                                               | 1.86E-06   | CD101, PTPRC, CD8A, CXCR3, MARCO, IGSF6, P2RX7, DOK2, LILRA1, KLRG1, CD2, CD4, KLRC1                                                                                                        |
| GO:0007165~signal transduction                                                                   | 1.27E-05   | ITGAL, KLRK1, RASSF7, APBB1IP, CD48, PDE6B, LPXN, TAGAP, DAPP1, LILRA2, EVI2A, CD4, IL2RG, INPP5D, ARHGAP8, TYROBP, TRAT1, DAPK1, LILRB1, DOK2, RGS1, CD33, LILRB4, SRGAP3, TNFSF12-TNFSF13 |
| GO:0070098~chemokine-mediated signaling pathway                                                  | 0.00024757 | CCRL2, CCL3, CXCR4, CCR2, CXCR3, CCL5                                                                                                                                                       |
| GO:0007155~cell adhesion                                                                         | 0.00029116 | PARVG, ITGAL, SLAMF7, CXCR3, CD96, LPXN, CD33, TROAP, CD2, DSC2, CD4, GPNMB, SPP1                                                                                                           |
| GO:0002407~dendritic cell chemotaxis                                                             | 0.00030454 | PIK3CG, CXCR4, CCR2, CCL5                                                                                                                                                                   |
| GO:0050850~positive regulation of calcium-mediated signaling                                     | 0.00050175 | CCL3, CD8A, CD4, TRAT1                                                                                                                                                                      |
| GO:0042110~T cell activation                                                                     | 0.0005153  | PIK3CG, CD48, CD8A, CD2, WAS                                                                                                                                                                |
| GO:0019722~calcium-mediated signaling                                                            | 0.00070455 | LAT2, CCL3, CXCR4, CXCR3, RCAN3                                                                                                                                                             |
| GO:0050852~T cell receptor signaling pathway                                                     | 0.00115959 | PTPRC, PRKCQ, TRAC, CD4, INPP5D, WAS, TRAT1                                                                                                                                                 |
| GO:0019441~tryptophan catabolic process to kynurenine                                            | 0.00127396 | KYNU, TDO2, KMO                                                                                                                                                                             |
| GO:0042102~positive regulation of T cell proliferation                                           | 0.00130139 | PTPRC, PRKCQ, CD4, CCL5, SASH3                                                                                                                                                              |
| GO:0006968~cellular defense response                                                             | 0.00147074 | KLRC4, KLRG1, CCR2, TRAT1, TYROBP                                                                                                                                                           |
| GO:0010818~T cell chemotaxis                                                                     | 0.0016898  | PIK3CG, CCL3, CXCR3                                                                                                                                                                         |
| GO:0006952~defense response                                                                      | 0.00196025 | CD48, LILRA1, LILRA2, WAS, SP140                                                                                                                                                            |

|                                                                                                                        |            |                                                                                            |
|------------------------------------------------------------------------------------------------------------------------|------------|--------------------------------------------------------------------------------------------|
| GO:0071222~cellular response to lipopolysaccharide                                                                     | 0.00204893 | LILRB1, STAP1, KLRK1, ABCA1, TLR5, NR1H3                                                   |
| GO:0006569~tryptophan catabolic process                                                                                | 0.00216135 | KYNU, TDO2, KMO                                                                            |
| GO:0045087~innate immune response                                                                                      | 0.00224265 | PIK3CG, TNFAIP8L2, MARCO, C1QA, KLRG1, KLRK1, LY9, TLR5, TLR7, APOBEC3C, TYROBP            |
| GO:0006935~chemotaxis                                                                                                  | 0.00285984 | CCRL2, CCL3, CXCR4, CCR2, CXCR3, CCL5                                                      |
| GO:0007204~positive regulation of cytosolic calcium ion concentration                                                  | 0.00427603 | PIK3CG, CXCR4, CCR2, CD52, CXCR3, F2R                                                      |
| GO:0006915~apoptotic process                                                                                           | 0.00544287 | CXCR4, GZMA, GPR65, CD2, BUB1B, BIRC5, INPP5D, CXCR3, TNFSF12-TNFSF13, RASSF7, MELK, DAPK1 |
| GO:0007169~transmembrane receptor protein tyrosine kinase signaling pathway                                            | 0.00712668 | DOK2, STAP1, CD8A, CD4, TRAT1                                                              |
| GO:0030101~natural killer cell activation                                                                              | 0.0107757  | CD2, KLRK1, SLAMF7                                                                         |
| GO:0019835~cytolysis                                                                                                   | 0.01184872 | P2RX7, GZMA, LYZ                                                                           |
| GO:0070374~positive regulation of ERK1 and ERK2 cascade                                                                | 0.01280086 | CCL3, CYSLTR2, CCL5, GPNMB, ARHGAP8, F2R                                                   |
| GO:0043547~positive regulation of GTPase activity                                                                      | 0.01444209 | TAGAP, CCL3, RGS1, ACAP1, SRGAP3, CYTH4, IL2RG, RGS18, CCL5, ARHGAP8, FGD6                 |
| GO:0045671~negative regulation of osteoclast differentiation                                                           | 0.01533383 | CCL3, LILRB4, INPP5D                                                                       |
| GO:2000473~positive regulation of hematopoietic stem cell migration                                                    | 0.01577861 | PTPRC, CCR2                                                                                |
| GO:0019442~tryptophan catabolic process to acetyl-CoA                                                                  | 0.01577861 | KYNU, TDO2                                                                                 |
| GO:0050900~leukocyte migration                                                                                         | 0.01611408 | CD48, ITGAL, DOK2, CD2, INPP5D                                                             |
| GO:0051928~positive regulation of calcium ion transport                                                                | 0.01787138 | CCL3, CCL5, F2R                                                                            |
| GO:0050729~positive regulation of inflammatory response                                                                | 0.02019967 | CCL3, CCR2, CCL5, TLR7                                                                     |
| GO:0048873~homeostasis of number of cells within a tissue                                                              | 0.02198425 | P2RX7, SASH3, F2R                                                                          |
| GO:0002291~T cell activation via T cell receptor contact with antigen bound to MHC molecule on antigen presenting cell | 0.02357501 | ITGAL, APBB1IP                                                                             |
| GO:0043420~anthranilate metabolic process                                                                              | 0.02357501 | KYNU, KMO                                                                                  |
| GO:0019805~quinolinate biosynthetic process                                                                            | 0.02357501 | KYNU, KMO                                                                                  |

|                                                                                                     |            |                                                                                              |
|-----------------------------------------------------------------------------------------------------|------------|----------------------------------------------------------------------------------------------|
| GO:0007186~G-protein coupled receptor signaling pathway                                             | 0.02605438 | PIK3CG, CCL3, GPR65, RGS18, ABCA1, CXCR3, CCL5, CCRL2, GPR34, RGS1, CXCR4, CCR2, SUCNR1, F2R |
| GO:0009968~negative regulation of signal transduction                                               | 0.02960931 | RGS1, RGS18, INPP5D                                                                          |
| GO:0050918~positive chemotaxis                                                                      | 0.03124371 | CCL3, CCL5, GPNMB                                                                            |
| GO:0034354~'de novo' NAD biosynthetic process from tryptophan                                       | 0.0313101  | KYNU, KMO                                                                                    |
| GO:0043308~eosinophil degranulation                                                                 | 0.0313101  | CCL3, VAMP8                                                                                  |
| GO:0030260~entry into host cell                                                                     | 0.0313101  | CXCR4, CD4                                                                                   |
| GO:0045919~positive regulation of cytolysis                                                         | 0.0313101  | LILRB1, P2RX7                                                                                |
| GO:0042130~negative regulation of T cell proliferation                                              | 0.03461663 | LILRB1, GPNMB, VSIG4                                                                         |
| GO:2001199~negative regulation of dendritic cell differentiation                                    | 0.03898438 | LILRB1, TMEM176B                                                                             |
| GO:0001915~negative regulation of T cell mediated cytotoxicity                                      | 0.03898438 | LILRB1, PTPRC                                                                                |
| GO:0051209~release of sequestered calcium ion into cytosol                                          | 0.04176106 | PTPRC, P2RX7, F2R                                                                            |
| GO:0051607~defense response to virus                                                                | 0.04226899 | LILRB1, PTPRC, CD8A, TLR7, APOBEC3C                                                          |
| GO:0097191~extrinsic apoptotic signaling pathway                                                    | 0.04362658 | P2RX7, KRT8, TNFSF12-TNFSF13                                                                 |
| GO:0060706~cell differentiation involved in embryonic placenta development                          | 0.04659831 | KRT8, EOMES                                                                                  |
| GO:0010887~negative regulation of cholesterol storage                                               | 0.04659831 | ABCA1, NR1H3                                                                                 |
| GO:0061737~leukotriene signaling pathway                                                            | 0.04659831 | RGS1, CYSLTR2                                                                                |
| <b>Genes with down-regulated expression and hyper-methylated CpG island in the promoter regions</b> |            |                                                                                              |
| GO:0045926~negative regulation of growth                                                            | 6.14E-05   | MT1M, GPC3, MT2A, MT1X                                                                       |
| GO:0001525~angiogenesis                                                                             | 0.00030609 | TAL1, PROK2, APOD, HIF3A, SOX18, SOX17, MMRN2                                                |
| GO:0071294~cellular response to zinc ion                                                            | 0.0027199  | MT1M, MT2A, MT1X                                                                             |
| GO:0048866~stem cell fate specification                                                             | 0.00820156 | SOX18, SOX17                                                                                 |
| GO:0036018~cellular response to                                                                     | 0.00820156 | MT2A, MT1X                                                                                   |

|                                                                                 |            |                                                             |
|---------------------------------------------------------------------------------|------------|-------------------------------------------------------------|
| erythropoietin                                                                  |            |                                                             |
| GO:0030522~intracellular receptor signaling pathway                             | 0.01063405 | NR4A1, RORB, NR4A3                                          |
| GO:0003151~outflow tract morphogenesis                                          | 0.01532978 | CLDN5, SOX18, SOX17                                         |
| GO:0060214~endocardium formation                                                | 0.01633682 | SOX18, SOX17                                                |
| GO:0007204~positive regulation of cytosolic calcium ion concentration           | 0.01775463 | PROK2, S1PR3, AVPR1A, TAC1                                  |
| GO:0019233~sensory perception of pain                                           | 0.01933272 | PROK2, SCN3B, TAC1                                          |
| GO:0060956~endocardial cell differentiation                                     | 0.02037975 | SOX18, SOX17                                                |
| GO:0007283~spermatogenesis                                                      | 0.02095653 | PROK2, SSTR1, SERPINA5, HOXA10, HOXA9, SOX17                |
| GO:0043401~steroid hormone mediated signaling pathway                           | 0.02296607 | NR4A1, RORB, NR4A3                                          |
| GO:0071376~cellular response to corticotropin-releasing hormone stimulus        | 0.02440631 | NR4A1, NR4A3                                                |
| GO:0071638~negative regulation of monocyte chemotactic protein-1 production     | 0.02440631 | APOD, C1QTNF3                                               |
| GO:0035356~cellular triglyceride homeostasis                                    | 0.02841655 | DGAT2, C1QTNF3                                              |
| GO:0061469~regulation of type B pancreatic cell proliferation                   | 0.03241055 | NR4A1, NR4A3                                                |
| GO:0072091~regulation of stem cell proliferation                                | 0.03241055 | SOX18, SOX17                                                |
| GO:0034383~low-density lipoprotein particle clearance                           | 0.03241055 | LDLR, DGAT2                                                 |
| GO:0045444~fat cell differentiation                                             | 0.03626703 | C1QTNF3, NR4A1, NR4A3                                       |
| GO:0046339~diacylglycerol metabolic process                                     | 0.03638837 | DGAT2, DGKD                                                 |
| GO:0010038~response to metal ion                                                | 0.04035007 | MT2A, MT1X                                                  |
| GO:0009952~anterior/posterior pattern specification                             | 0.04282073 | HOXA10, HOXA9, ZBTB16                                       |
| GO:0010867~positive regulation of triglyceride biosynthetic process             | 0.04429571 | LDLR, DGAT2                                                 |
| GO:0045944~positive regulation of transcription from RNA polymerase II promoter | 0.04725133 | CSF3, TAL1, EBF2, HOXA10, HIF3A, NR4A1, SOX18, SOX17, NR4A3 |
| GO:0045778~positive regulation of ossification                                  | 0.04822537 | TAC1, ZBTB16                                                |

|                                                          |            |              |
|----------------------------------------------------------|------------|--------------|
| GO:0035815~positive regulation of renal sodium excretion | 0.04822537 | AVPR1A, TAC1 |
|----------------------------------------------------------|------------|--------------|

**Supplementary Table 5. Differential expression genes in atheroma plaque vs. intact tissue.**

| <b>Up-regulated genes in atheroma plaque than in intact tissue</b> |            |          |                                                                              |
|--------------------------------------------------------------------|------------|----------|------------------------------------------------------------------------------|
| Gene.symbol                                                        | Adjusted P | logFC    | Gene.title                                                                   |
| SP140                                                              | 0.000017   | 0.734813 | SP140 nuclear body protein                                                   |
| OSBPL3                                                             | 2.36E-05   | 0.806669 | oxysterol binding protein like 3                                             |
| INPP5D                                                             | 2.39E-05   | 0.733255 | inositol polyphosphate-5-phosphatase D                                       |
| CYTH4                                                              | 2.85E-05   | 0.876796 | cytohesin 4                                                                  |
| LRMP                                                               | 3.69E-05   | 0.73868  | lymphoid restricted membrane protein                                         |
| RBM47                                                              | 3.69E-05   | 0.815586 | RNA binding motif protein 47                                                 |
| TYROBP                                                             | 4.54E-05   | 0.841439 | TYRO protein tyrosine kinase binding protein                                 |
| CD4                                                                | 4.75E-05   | 0.934919 | CD4 molecule                                                                 |
| APBB1IP                                                            | 4.93E-05   | 0.886038 | amyloid beta precursor protein binding family B member 1 interacting protein |
| LAIR1                                                              | 5.21E-05   | 0.895547 | leukocyte associated immunoglobulin like receptor 1                          |
| DCSTAMP                                                            | 5.35E-05   | 1.005814 | dendrocyte expressed seven transmembrane protein                             |
| TBXAS1                                                             | 5.43E-05   | 0.767749 | thromboxane A synthase 1                                                     |
| ITGAL                                                              | 5.83E-05   | 0.763293 | integrin subunit alpha L                                                     |
| C1QA                                                               | 6.76E-05   | 0.842387 | complement C1q A chain                                                       |
| LPXN                                                               | 7.04E-05   | 0.694234 | leupaxin                                                                     |
| TMEM26                                                             | 7.21E-05   | 0.462497 | transmembrane protein 26                                                     |
| TDO2                                                               | 7.34E-05   | 1.150758 | tryptophan 2,3-dioxygenase                                                   |
| PIK3CG                                                             | 7.79E-05   | 0.723562 | phosphatidylinositol-4,5-bisphosphate 3-kinase catalytic subunit gamma       |
| CD33                                                               | 7.95E-05   | 0.646166 | CD33 molecule                                                                |
| VSIG4                                                              | 8.12E-05   | 0.808859 | V-set and immunoglobulin domain containing 4                                 |
| LY9                                                                | 8.68E-05   | 0.378471 | lymphocyte antigen 9                                                         |
| KMO                                                                | 9.06E-05   | 1.124363 | kynurenine 3-monooxygenase (kynurenine 3-hydroxylase)                        |
| IL2RG                                                              | 0.000102   | 0.91399  | interleukin 2 receptor subunit gamma                                         |
| LGMN                                                               | 0.000103   | 0.657581 | legumain                                                                     |
| TNFAIP8L2                                                          | 0.000106   | 0.407538 | TNF alpha induced protein 8 like 2                                           |
| FGD6                                                               | 0.000107   | 0.48512  | FYVE, RhoGEF and PH domain containing 6                                      |
| TAGAP                                                              | 0.000115   | 0.663041 | T-cell activation RhoGTPase activating protein                               |
| DAPP1                                                              | 0.000116   | 0.776533 | dual adaptor of phosphotyrosine and 3-                                       |

|          |          |          |                                                           |
|----------|----------|----------|-----------------------------------------------------------|
|          |          |          | phosphoinositides 1                                       |
| ABCC3    | 0.000125 | 0.499857 | ATP binding cassette subfamily C member 3                 |
| CD48     | 0.00013  | 0.896888 | CD48 molecule                                             |
| CD52     | 0.000135 | 1.263187 | CD52 molecule                                             |
| PARVG    | 0.000149 | 0.670897 | parvin gamma                                              |
| SASH3    | 0.000157 | 0.495667 | SAM and SH3 domain containing 3                           |
| SLAMF8   | 0.000198 | 0.856962 | SLAM family member 8                                      |
| P2RX7    | 0.000217 | 0.714638 | purinergic receptor P2X 7                                 |
| KYNU     | 0.000267 | 1.047221 | kynureninase                                              |
| LAT2     | 0.000278 | 0.39497  | linker for activation of T-cells family member 2          |
| SLAMF7   | 0.000278 | 0.944498 | SLAM family member 7                                      |
| LILRB4   | 0.000282 | 0.948193 | leukocyte immunoglobulin like receptor B4                 |
| GMFG     | 0.000292 | 0.872371 | glia maturation factor gamma                              |
| TMEM176B | 0.000313 | 0.598434 | transmembrane protein 176B                                |
| APOBEC3C | 0.00033  | 0.291823 | apolipoprotein B mRNA editing enzyme catalytic subunit 3C |
| NR1H3    | 0.000351 | 0.766277 | nuclear receptor subfamily 1 group H member 3             |
| DOK2     | 0.000358 | 0.634386 | docking protein 2                                         |
| LILRB1   | 0.00037  | 0.695449 | leukocyte immunoglobulin like receptor B1                 |
| TRAF3IP3 | 0.000377 | 0.536955 | TRAF3 interacting protein 3                               |
| MS4A4A   | 0.000418 | 0.938973 | membrane spanning 4-domains A4A                           |
| DAPK1    | 0.000418 | 0.56557  | death associated protein kinase 1                         |
| PTPRC    | 0.000441 | 0.790281 | protein tyrosine phosphatase, receptor type C             |
| APOBR    | 0.00051  | 0.504868 | apolipoprotein B receptor                                 |
| VAMP8    | 0.000523 | 0.850513 | vesicle associated membrane protein 8                     |
| ATP6V0D2 | 0.000531 | 1.42507  | ATPase H <sup>+</sup> transporting V0 subunit d2          |
| GPR65    | 0.000533 | 0.803471 | G protein-coupled receptor 65                             |
| RAB42    | 0.00057  | 0.539136 | RAB42, member RAS oncogene family                         |
| LYZ      | 0.000643 | 0.89793  | lysozyme                                                  |
| KCNA3    | 0.000655 | 0.69079  | potassium voltage-gated channel subfamily A member 3      |
| EVI2A    | 0.000663 | 0.696684 | ecotropic viral integration site 2A                       |
| OSCAR    | 0.000699 | 0.301462 | osteoclast associated, immunoglobulin-like receptor       |
| ARL11    | 0.000718 | 0.341956 | ADP ribosylation factor like GTPase 11                    |
| WAS      | 0.00073  | 0.428687 | Wiskott-Aldrich syndrome                                  |
| MKI67    | 0.00082  | 0.628757 | marker of proliferation Ki-67                             |
| ADAM28   | 0.000844 | 0.728816 | ADAM metallopeptidase domain 28                           |

|          |          |          |                                                   |
|----------|----------|----------|---------------------------------------------------|
| DSC2     | 0.000863 | 0.718324 | desmocollin 2                                     |
| IKZF3    | 0.001017 | 0.504934 | IKAROS family zinc finger 3                       |
| ABRACL   | 0.001271 | 0.406791 | ABRA C-terminal like                              |
| MS4A6A   | 0.001566 | 0.659031 | membrane spanning 4-domains A6A                   |
| RCAN3    | 0.001999 | 0.402779 | RCAN family member 3                              |
| CCL3     | 0.002205 | 0.72473  | C-C motif chemokine ligand 3                      |
| FCGR3A   | 0.002209 | 0.587133 | Fc fragment of IgG receptor IIIa                  |
| C15orf48 | 0.002328 | 0.850664 | chromosome 15 open reading frame 48               |
| ARL4C    | 0.002365 | 0.539493 | ADP ribosylation factor like GTPase 4C            |
| MLPH     | 0.002474 | 0.357323 | melanophilin                                      |
| CXCR4    | 0.002977 | 0.733738 | C-X-C motif chemokine receptor 4                  |
| PRKCQ    | 0.003391 | 0.29882  | protein kinase C theta                            |
| GPNMB    | 0.003558 | 0.413603 | glycoprotein nmb                                  |
| KLRG1    | 0.003778 | 0.545981 | killer cell lectin like receptor G1               |
| LILRA1   | 0.003999 | 0.408118 | leukocyte immunoglobulin like receptor A1         |
| ASF1B    | 0.004414 | 0.248729 | anti-silencing function 1B histone chaperone      |
| BUB1B    | 0.004512 | 0.299599 | BUB1 mitotic checkpoint serine/threonine kinase B |
| TLR5     | 0.00461  | 0.39313  | toll like receptor 5                              |
| GAL3ST4  | 0.004759 | 0.178324 | galactose-3-O-sulfotransferase 4                  |
| MELK     | 0.005172 | 0.453615 | maternal embryonic leucine zipper kinase          |
| SPP1     | 0.005223 | 0.732547 | secreted phosphoprotein 1                         |
| RGS1     | 0.005425 | 1.094815 | regulator of G-protein signaling 1                |
| IGSF6    | 0.005748 | 0.598643 | immunoglobulin superfamily member 6               |
| CCR2     | 0.006198 | 0.665934 | C-C motif chemokine receptor 2                    |
| GAPT     | 0.006268 | 0.500738 | GRB2-binding adaptor protein, transmembrane       |
| GAS2L3   | 0.006465 | 0.600409 | growth arrest specific 2 like 3                   |
| CCR2     | 0.006702 | 0.673273 | C-C motif chemokine receptor 2                    |
| KIF20A   | 0.00715  | 0.319472 | kinesin family member 20A                         |
| SAMD3    | 0.007251 | 0.363712 | sterile alpha motif domain containing 3           |
| RUNX3    | 0.007317 | 0.221726 | runt related transcription factor 3               |
| ABCA1    | 0.008679 | 0.618414 | ATP binding cassette subfamily A member 1         |
| CD96     | 0.010228 | 0.526478 | CD96 molecule                                     |
| MARCO    | 0.010576 | 0.756033 | macrophage receptor with collagenous structure    |
| CD101    | 0.010608 | 0.282858 | CD101 molecule                                    |
| GPR34    | 0.010613 | 0.511924 | G protein-coupled receptor 34                     |



|                                                                      |          |          |                                                                     |
|----------------------------------------------------------------------|----------|----------|---------------------------------------------------------------------|
| STAP1                                                                | 0.010942 | 0.344782 | signal transducing adaptor family member 1                          |
| PDE6B                                                                | 0.011124 | 0.146415 | phosphodiesterase 6B                                                |
| RGS18                                                                | 0.011539 | 0.469008 | regulator of G-protein signaling 18                                 |
| MYBL2                                                                | 0.011829 | 0.174273 | MYB proto-oncogene like 2                                           |
| TLR7                                                                 | 0.01282  | 0.553648 | toll like receptor 7                                                |
| LILRA2                                                               | 0.018283 | 0.370121 | leukocyte immunoglobulin like receptor A2                           |
| CCL5                                                                 | 0.023027 | 0.495952 | C-C motif chemokine ligand 5                                        |
| CD2                                                                  | 0.02442  | 0.431276 | CD2 molecule                                                        |
| KLRC1                                                                | 0.028104 | 0.22484  | killer cell lectin like receptor C1                                 |
| GZMA                                                                 | 0.032827 | 0.454223 | granzyme A                                                          |
| TK1                                                                  | 0.033425 | 0.15658  | thymidine kinase 1                                                  |
| CD8A                                                                 | 0.034795 | 0.209924 | CD8a molecule                                                       |
| APOC1                                                                | 0.045641 | 0.698262 | apolipoprotein C1                                                   |
| TRAT1                                                                | 0.049007 | 0.381661 | T cell receptor associated transmembrane adaptor 1                  |
| <b>Down-regulated genes in atheroma plaque than in intact tissue</b> |          |          |                                                                     |
| GPC3                                                                 | 1.91E-05 | -0.90553 | glypican 3                                                          |
| ATP1A2                                                               | 2.36E-05 | -0.85218 | ATPase Na <sup>+</sup> /K <sup>+</sup> transporting subunit alpha 2 |
| ADAMTS1                                                              | 0.000262 | -0.62713 | ADAM metalloproteinase with thrombospondin type 1 motif 1           |
| RBPM52                                                               | 0.000371 | -0.28513 | RNA binding protein with multiple splicing 2                        |
| DPY19L2                                                              | 0.000958 | -0.46136 | dpy-19 like 2                                                       |
| GALNT15                                                              | 0.00138  | -0.57328 | polypeptide N-acetylgalactosaminyltransferase 15                    |
| ZBTB16                                                               | 0.001851 | -0.6847  | zinc finger and BTB domain containing 16                            |
| MEDAG                                                                | 0.003072 | -0.38058 | mesenteric estrogen dependent adipogenesis                          |
| AVPR1A                                                               | 0.008679 | -0.23005 | arginine vasopressin receptor 1A                                    |
| RORB                                                                 | 0.033712 | -0.12479 | RAR related orphan receptor B                                       |

**Supplementary Table 6. Differential expression genes in advanced vs. early atherosclerotic artery tissue.**

| <b>Up-regulated genes in advanced than in early AS atherosclerotic artery</b> |            |          |                                                                              |
|-------------------------------------------------------------------------------|------------|----------|------------------------------------------------------------------------------|
| Gene.symbol                                                                   | Adjusted P | logFC    | Gene.title                                                                   |
| ABCA1                                                                         | 2.59E-04   | 1.162925 | ATP binding cassette subfamily A member 1                                    |
| ABCA1                                                                         | 7.70E-04   | 0.999779 | ATP binding cassette subfamily A member 1                                    |
| ABRACL                                                                        | 4.34E-02   | 0.99401  | ABRA C-terminal like                                                         |
| ADAM28                                                                        | 1.45E-03   | 1.245846 | ADAM metallopeptidase domain 28                                              |
| ADAM28                                                                        | 4.07E-02   | 0.340491 | ADAM metallopeptidase domain 28                                              |
| APBB1IP                                                                       | 1.34E-03   | 0.960008 | amyloid beta precursor protein binding family B member 1 interacting protein |
| APOBEC3C                                                                      | 4.54E-02   | 0.245527 | apolipoprotein B mRNA editing enzyme catalytic subunit 3C                    |
| APOC1                                                                         | 1.24E-03   | 0.878254 | apolipoprotein C1                                                            |
| APOC1                                                                         | 1.44E-03   | 1.822423 | apolipoprotein C1                                                            |
| ARL11                                                                         | 4.47E-02   | 0.372961 | ADP ribosylation factor like GTPase 11                                       |
| ARL4C                                                                         | 1.20E-03   | 0.919834 | ADP ribosylation factor like GTPase 4C                                       |
| ARL4C                                                                         | 1.43E-03   | 1.883505 | ADP ribosylation factor like GTPase 4C                                       |
| ARL4C                                                                         | 9.46E-03   | 1.285685 | ADP ribosylation factor like GTPase 4C                                       |
| BUB1B                                                                         | 1.58E-03   | 0.394727 | BUB1 mitotic checkpoint serine/threonine kinase B                            |
| C15orf48                                                                      | 1.49E-03   | 1.364491 | chromosome 15 open reading frame 48                                          |
| C1QA                                                                          | 1.50E-04   | 1.452946 | complement C1q A chain                                                       |
| CCL5                                                                          | 7.58E-03   | 1.087311 | C-C motif chemokine ligand 5                                                 |
| CCL5                                                                          | 7.91E-03   | 1.075832 | C-C motif chemokine ligand 5                                                 |
| CCL5                                                                          | 1.32E-02   | 0.821746 | C-C motif chemokine ligand 5                                                 |
| CCR2                                                                          | 4.14E-03   | 0.517919 | C-C motif chemokine receptor 2                                               |
| CD2                                                                           | 4.04E-03   | 0.449125 | CD2 molecule                                                                 |
| CD33                                                                          | 1.08E-02   | 0.459837 | CD33 molecule                                                                |
| CD4                                                                           | 2.27E-03   | 0.764285 | CD4 molecule                                                                 |
| CD48                                                                          | 7.02E-05   | 1.323418 | CD48 molecule                                                                |
| CD52                                                                          | 3.34E-05   | 1.577455 | CD52 molecule                                                                |
| CD52                                                                          | 7.64E-05   | 1.983144 | CD52 molecule                                                                |
| CXCR4                                                                         | 1.92E-03   | 2.015581 | C-X-C motif chemokine receptor 4                                             |
| CXCR4                                                                         | 2.02E-03   | 1.734262 | C-X-C motif chemokine receptor 4                                             |
| CXCR4                                                                         | 3.38E-03   | 1.691841 | C-X-C motif chemokine receptor 4                                             |
| CYTH4                                                                         | 6.55E-06   | 0.95839  | cytohesin 4                                                                  |
| DAPK1                                                                         | 4.84E-04   | 1.23475  | death associated protein kinase 1                                            |

|        |          |          |                                                           |
|--------|----------|----------|-----------------------------------------------------------|
| DAPP1  | 1.51E-02 | 0.382939 | dual adaptor of phosphotyrosine and 3-phosphoinositides 1 |
| DAPP1  | 4.45E-02 | 0.435469 | dual adaptor of phosphotyrosine and 3-phosphoinositides 1 |
| DOK2   | 2.11E-03 | 0.43852  | docking protein 2                                         |
| DSC2   | 3.48E-04 | 0.896625 | desmocollin 2                                             |
| DSC2   | 6.11E-03 | 0.309384 | desmocollin 2                                             |
| EVI2A  | 2.81E-03 | 1.413796 | ecotropic viral integration site 2A                       |
| GAS2L3 | 1.67E-03 | 0.612177 | growth arrest specific 2 like 3                           |
| GMFG   | 2.88E-04 | 1.05535  | glia maturation factor gamma                              |
| GPNMB  | 1.84E-02 | 0.570354 | glycoprotein nmb                                          |
| GPR34  | 2.32E-02 | 1.414389 | G protein-coupled receptor 34                             |
| GPR65  | 6.27E-04 | 0.749496 | G protein-coupled receptor 65                             |
| GZMA   | 1.76E-02 | 0.61803  | granzyme A                                                |
| IGSF6  | 2.52E-04 | 1.079022 | immunoglobulin superfamily member 6                       |
| IL2RG  | 6.68E-04 | 0.905319 | interleukin 2 receptor subunit gamma                      |
| INPP5D | 6.12E-04 | 0.870383 | inositol polyphosphate-5-phosphatase D                    |
| INPP5D | 2.62E-02 | 0.201731 | inositol polyphosphate-5-phosphatase D                    |
| ITGAL  | 2.63E-04 | 0.887136 | integrin subunit alpha L                                  |
| ITGAL  | 3.65E-04 | 0.4475   | integrin subunit alpha L                                  |
| KIF20A | 8.39E-03 | 0.449123 | kinesin family member 20A                                 |
| KMO    | 3.06E-04 | 0.931282 | kynurenine 3-monooxygenase (kynurenine 3-hydroxylase)     |
| KMO    | 3.88E-03 | 0.910496 | kynurenine 3-monooxygenase (kynurenine 3-hydroxylase)     |
| KYNU   | 7.64E-05 | 2.036197 | kynureninase                                              |
| KYNU   | 3.11E-03 | 0.435811 | kynureninase                                              |
| KYNU   | 4.12E-03 | 0.743324 | kynureninase                                              |
| LAIR1  | 4.98E-05 | 0.548483 | leukocyte associated immunoglobulin like receptor 1       |
| LAIR1  | 1.63E-04 | 1.456417 | leukocyte associated immunoglobulin like receptor 1       |
| LAT2   | 1.35E-04 | 0.851482 | linker for activation of T-cells family member 2          |
| LGMN   | 2.26E-03 | 0.998596 | legumain                                                  |
| LILRA2 | 5.44E-03 | 0.513172 | leukocyte immunoglobulin like receptor A2                 |
| LILRA2 | 2.11E-02 | 0.284086 | leukocyte immunoglobulin like receptor A2                 |
| LILRB1 | 4.31E-04 | 0.696875 | leukocyte immunoglobulin like receptor B1                 |
| LILRB1 | 5.11E-04 | 0.688577 | leukocyte immunoglobulin like receptor B1                 |
| LILRB4 | 1.18E-02 | 0.846391 | leukocyte immunoglobulin like receptor B4                 |
| LPXN   | 2.43E-03 | 0.874111 | leupaxin                                                  |
| LRMP   | 4.05E-03 | 0.465468 | lymphoid restricted membrane protein                      |

|        |          |          |                                                                        |
|--------|----------|----------|------------------------------------------------------------------------|
| LRMP   | 9.97E-03 | 0.542583 | lymphoid restricted membrane protein                                   |
| LY9    | 4.67E-02 | 0.27122  | lymphocyte antigen 9                                                   |
| MARCO  | 8.39E-04 | 1.201199 | macrophage receptor with collagenous structure                         |
| MELK   | 1.44E-03 | 0.5166   | maternal embryonic leucine zipper kinase                               |
| MKI67  | 4.59E-03 | 0.446221 | marker of proliferation Ki-67                                          |
| MLPH   | 7.08E-03 | 0.710845 | melanophilin                                                           |
| MS4A4A | 3.05E-04 | 1.006839 | membrane spanning 4-domains A4A                                        |
| MS4A4A | 1.00E-03 | 1.761363 | membrane spanning 4-domains A4A                                        |
| MS4A4A | 5.40E-03 | 2.004715 | membrane spanning 4-domains A4A                                        |
| MS4A6A | 5.69E-04 | 1.235292 | membrane spanning 4-domains A6A                                        |
| MS4A6A | 1.44E-03 | 1.374    | membrane spanning 4-domains A6A                                        |
| MS4A6A | 1.80E-03 | 1.385346 | membrane spanning 4-domains A6A                                        |
| MS4A6A | 1.97E-03 | 0.827928 | membrane spanning 4-domains A6A                                        |
| MS4A6A | 1.99E-03 | 1.386866 | membrane spanning 4-domains A6A                                        |
| MS4A6A | 2.24E-02 | 1.083691 | membrane spanning 4-domains A6A                                        |
| NR1H3  | 7.31E-03 | 0.609153 | nuclear receptor subfamily 1 group H member 3                          |
| OSBPL3 | 2.42E-04 | 0.954952 | oxysterol binding protein like 3                                       |
| OSBPL3 | 3.38E-02 | 0.462119 | oxysterol binding protein like 3                                       |
| OSCAR  | 1.87E-02 | 0.390103 | osteoclast associated, immunoglobulin-like receptor                    |
| P2RX7  | 3.02E-05 | 0.859049 | purinergic receptor P2X 7                                              |
| P2RX7  | 2.61E-04 | 1.700264 | purinergic receptor P2X 7                                              |
| PARVG  | 5.47E-05 | 0.90065  | parvin gamma                                                           |
| PARVG  | 7.11E-05 | 0.675143 | parvin gamma                                                           |
| PIK3CG | 4.45E-04 | 1.102316 | phosphatidylinositol-4,5-bisphosphate 3-kinase catalytic subunit gamma |
| PTPRC  | 5.60E-04 | 1.559453 | protein tyrosine phosphatase, receptor type C                          |
| PTPRC  | 2.41E-03 | 1.4814   | protein tyrosine phosphatase, receptor type C                          |
| PTPRC  | 5.95E-03 | 1.742707 | protein tyrosine phosphatase, receptor type C                          |
| RAB42  | 2.82E-03 | 0.369534 | RAB42, member RAS oncogene family                                      |
| RBM47  | 6.92E-05 | 0.946652 | RNA binding motif protein 47                                           |
| RBM47  | 1.28E-04 | 1.360641 | RNA binding motif protein 47                                           |
| RGS1   | 2.66E-02 | 1.485072 | regulator of G-protein signaling 1                                     |
| RGS1   | 2.91E-02 | 1.697574 | regulator of G-protein signaling 1                                     |
| RUNX3  | 1.37E-04 | 0.699472 | runt related transcription factor 3                                    |
| RUNX3  | 5.00E-03 | 0.363502 | runt related transcription factor 3                                    |
| SASH3  | 4.30E-05 | 0.91804  | SAM and SH3 domain containing 3                                        |

|                                                                                 |          |          |                                                                     |
|---------------------------------------------------------------------------------|----------|----------|---------------------------------------------------------------------|
| SLAMF7                                                                          | 9.19E-04 | 0.720952 | SLAM family member 7                                                |
| SLAMF7                                                                          | 1.70E-03 | 0.805796 | SLAM family member 7                                                |
| SLAMF7                                                                          | 6.11E-03 | 0.321702 | SLAM family member 7                                                |
| SLAMF8                                                                          | 1.90E-05 | 2.072546 | SLAM family member 8                                                |
| SLAMF8                                                                          | 7.11E-05 | 1.17073  | SLAM family member 8                                                |
| SP140                                                                           | 4.88E-02 | 0.266032 | SP140 nuclear body protein                                          |
| SPP1                                                                            | 4.77E-04 | 3.107965 | secreted phosphoprotein 1                                           |
| SPP1                                                                            | 8.19E-03 | 1.661208 | secreted phosphoprotein 1                                           |
| TAGAP                                                                           | 5.18E-03 | 0.872911 | T-cell activation RhoGTPase activating protein                      |
| TBXAS1                                                                          | 2.91E-03 | 0.686809 | thromboxane A synthase 1                                            |
| TBXAS1                                                                          | 3.05E-02 | 0.328366 | thromboxane A synthase 1                                            |
| TLR5                                                                            | 3.14E-03 | 0.821098 | toll like receptor 5                                                |
| TLR7                                                                            | 8.11E-03 | 0.651409 | toll like receptor 7                                                |
| TMEM176B                                                                        | 2.15E-03 | 1.360095 | transmembrane protein 176B                                          |
| TNFAIP8L2                                                                       | 1.62E-02 | 0.277846 | TNF alpha induced protein 8 like 2                                  |
| TRAF3IP3                                                                        | 7.41E-04 | 0.586792 | TRAF3 interacting protein 3                                         |
| TYROBP                                                                          | 1.84E-04 | 1.697715 | TYRO protein tyrosine kinase binding protein                        |
| VAMP8                                                                           | 2.38E-05 | 1.825385 | vesicle associated membrane protein 8                               |
| VSIG4                                                                           | 7.76E-04 | 1.431208 | V-set and immunoglobulin domain containing 4                        |
| WAS                                                                             | 1.13E-03 | 0.378008 | Wiskott-Aldrich syndrome                                            |
| WAS                                                                             | 2.45E-02 | 0.330596 | Wiskott-Aldrich syndrome                                            |
| <b>Down-regulated genes in advanced than in early AS atherosclerotic artery</b> |          |          |                                                                     |
| ATP1A2                                                                          | 1.28E-04 | -1.83392 | ATPase Na <sup>+</sup> /K <sup>+</sup> transporting subunit alpha 2 |
| ATP1A2                                                                          | 1.32E-03 | -1.46999 | ATPase Na <sup>+</sup> /K <sup>+</sup> transporting subunit alpha 2 |

Note: Each of the duplicate gene symbols represents individual probe for the same gene
